# Supplementary material
Source: PubMed Central journal article supplement (PMC10628837)
Supplement: jamaneurol-e233997-s001.pdf [file jamaneurol-e233997-s001.pdf]

## Supplementary Online Content

Abdelhak A, Benkert P, Schaedelin S, et al; UCSF, MS EPIC, and SMSC Study Teams. Neurofilament light chain elevation and disability progression in multiple sclerosis. *JAMA Neurol*. Published online November 6, 2023. doi:10.1001/jamaneurol.2023.3997

**eFigure 1.** Distribution of Time Points of Visits in Relation to Diagnosis of Confirmed Disability Worsening With and Independent of Clinical Relapses

**eFigure 2.** NfL Dynamics in Relation to Disability Worsening Independent of Clinical Relapses in Relation to Expanded Disability Status Scale at Sampling

**eFigure 3.** Subgroup Analysis in Relapsing Remitting MS: NfL Dynamics in Relation to Disability Worsening Independent of Clinical Relapses

**eFigure 4.** Sensitivity Analysis in Patients With Complete MRI Information at Each Visit: NfL Dynamics in Relation to Confirmed Disability Worsening Independent of Clinical Relapses Adjusted for Clinical and Radiological Disease Activity

**eTable 1.** NfL z Score (Marginal Means) in Relation to Confirmed Disability Worsening With and Independent of Clinical Relapses Compared to Stable Multiple Sclerosis

**eTable 2.** Mixed Effect Models Estimating Longitudinal NfL z Scores in Context of Confirmed Disability Worsening With Clinical Relapses

**eTable 3.** Mixed Effect Models Estimating Longitudinal NfL z Scores in Context of Confirmed Disability Worsening Independent of Clinical Relapses

**eTable 4.** Subgroup Analysis in People With Relapsing-Remitting Multiple Sclerosis: NfL z Score (Marginal Means) in Relation to Confirmed Disability Worsening Independent of Clinical Relapses Compared to Stable Multiple Sclerosis

**eTable 5.** Subgroup Analysis in People With Relapsing-Remitting Multiple Sclerosis: Mixed-Effects Models Evaluating Longitudinal NfL z Scores in Cases With Confirmed Disability Worsening Independent of Clinical Relapses in Participants With Relapsing-Remitting Multiple Sclerosis

**eTable 6.** Sensitivity Analyses in SMSC Restricted to Yearly Visits: NfL z Score (Marginal Means) in Relation to Confirmed Disability Worsening

**eTable 7.** Sensitivity Analysis in Participants With MRI Information Available at Each Visit: Mixed-Effects Models Estimating Longitudinal NfL z Scores in Context of Confirmed Disability Worsening Independent of Relapses, Accounting for Clinical and Magnetic Resonance Imaging Activity

**eTable 8.** Association Between NfL z Score and Future Risk of Confirmed Disability Worsening with Clinical Relapses at Visit CDW-R(-1)

**eTable 9.** Association Between NfL z Score > 1.0 and Future Risk of Confirmed Disability Worsening with Clinical Relapses at Visit CDW-R(-1)

**eTable 10.** Association Between NfL z Score and Future Risk of Confirmed Disability Worsening with Clinical Relapses at Visit CDW-R(-2)

**eTable 11.** Association Between NfL z Score > 1.0 and Future Risk of Confirmed Disability Worsening with Clinical Relapses at Visit CDW-R(-2)

**eTable 12.** Association Between NfL z Score and Future Risk of Confirmed Disability Worsening Independent of Clinical Relapses at Visit CDW-NR(-1)

**eTable 13.** Association Between NfL z Score > 1.0 and Future Risk of Confirmed Disability Worsening Independent of Clinical Relapses at Visit CDW-NR(-1)

**eTable 14.** Association Between NfL z Score and Future Risk of Confirmed Disability Worsening Independent of Clinical Relapses at Visit CDW-NR(-2)

**eTable 15.** Association Between NfL z Score > 1.0 and Future Risk of Confirmed Disability Worsening Independent of Clinical Relapses at Visit CDW-NR(-2)

This supplementary material has been provided by the authors to give readers additional information about their work.

**eFigure 1.** Distribution of Time Points of Visits in Relation to Diagnosis of Confirmed Disability Worsening With (A) and Independent of Clinical Relapses (B)

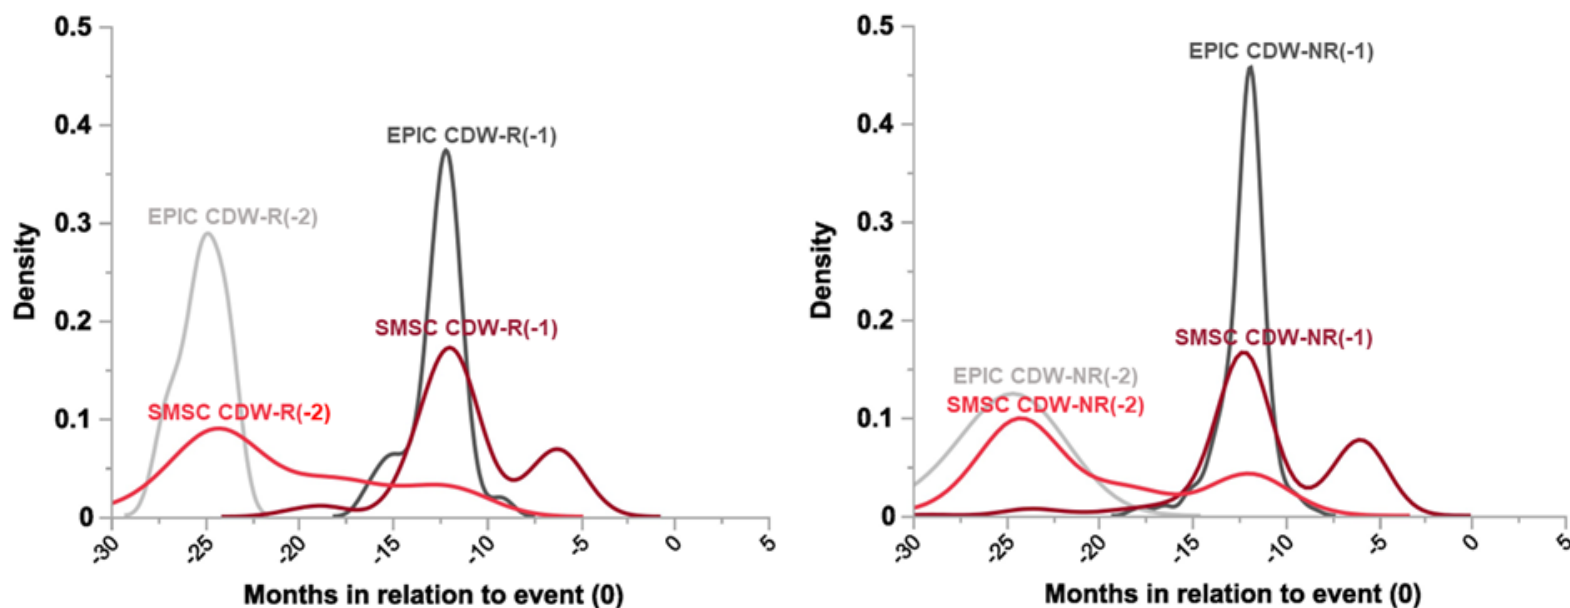

CDW-R: Disability worsening associated with clinical relapses, CDW-NR: Disability worsening independent of clinical relapses. CDW-R/CDW-NR(-2): Two visits preceding the event. CDW-R/CDW-NR(-1): Visit directly preceding the event. SMSC visits (red) showed bimodal distribution due to the high proportion of 6-monthly follow-up visits compared to EPIC (grey, almost exclusively yearly visits).

**eFigure 2.** NfL Dynamics in Relation to Disability Worsening Independent of Clinical Relapses in Relation to Expanded Disability Status Scale at Sampling

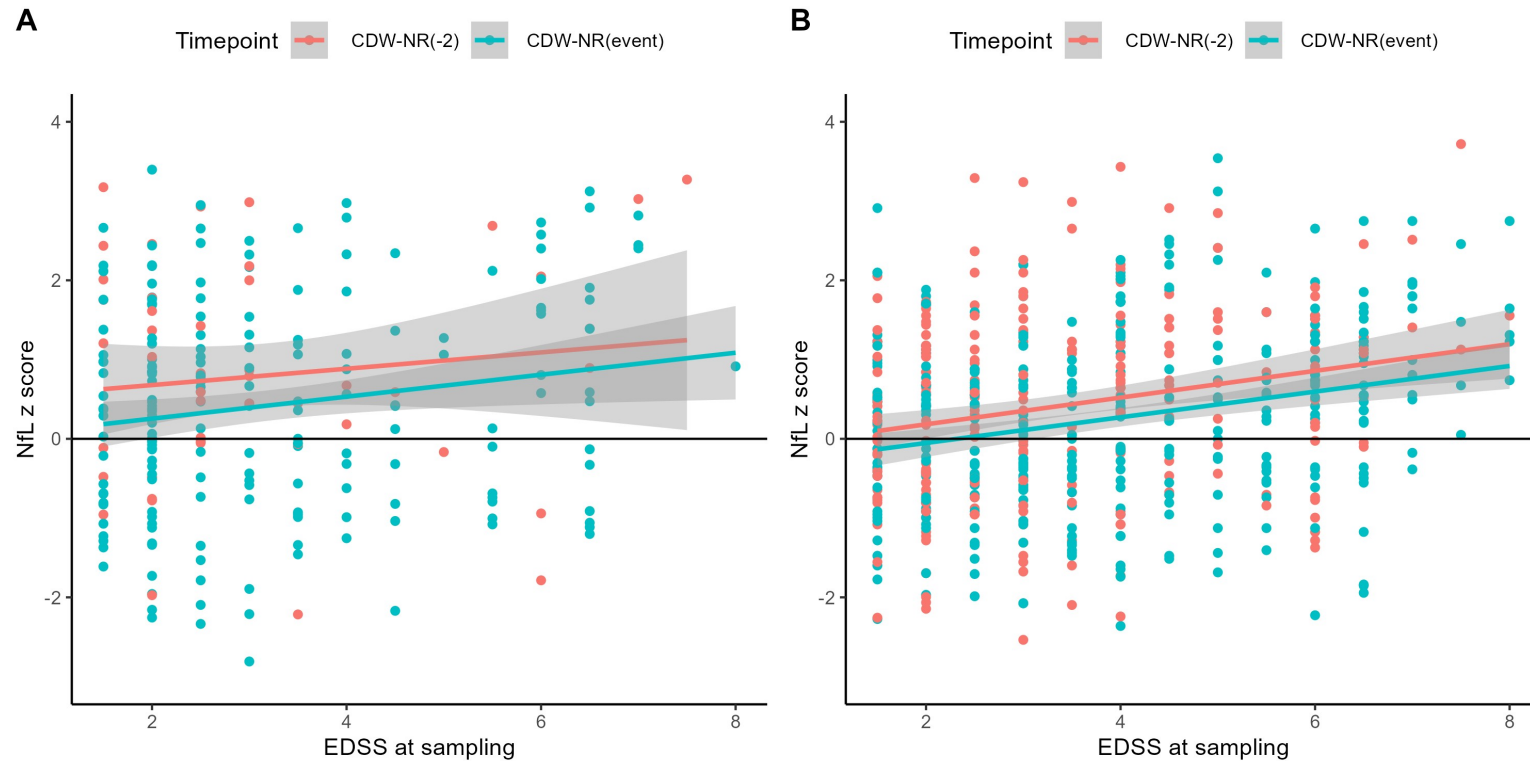

Figure showing the neurofilament light chain (NfL) z scores (y axis) at disability worsening independent of clinical relapses event visit (CDW-NR[event], turquoise) and at CDW-NR(-2) (red) in the EPIC cohort (A) and the SMSC (B) over the EDSS score at sampling (x axis). At both visits, in both studies, NfL z scores increase with EDSS at a similar magnitude /rate and are higher at CDW are on average higher at CDW-NR(-2) compared to CDW-NR(event). CDW-NR: Confirmed disability worsening independent of clinical relapses. CDW-NR(event)/(-2): CDW-NR event visit, or two visits preceding the event, EDSS: Expanded disability status scale.

**eFigure 3.** Subgroup Analysis in Relapsing Remitting Multiple Sclerosis: NfL Dynamics in Relation to Disability Worsening Independent of Clinical Relapses

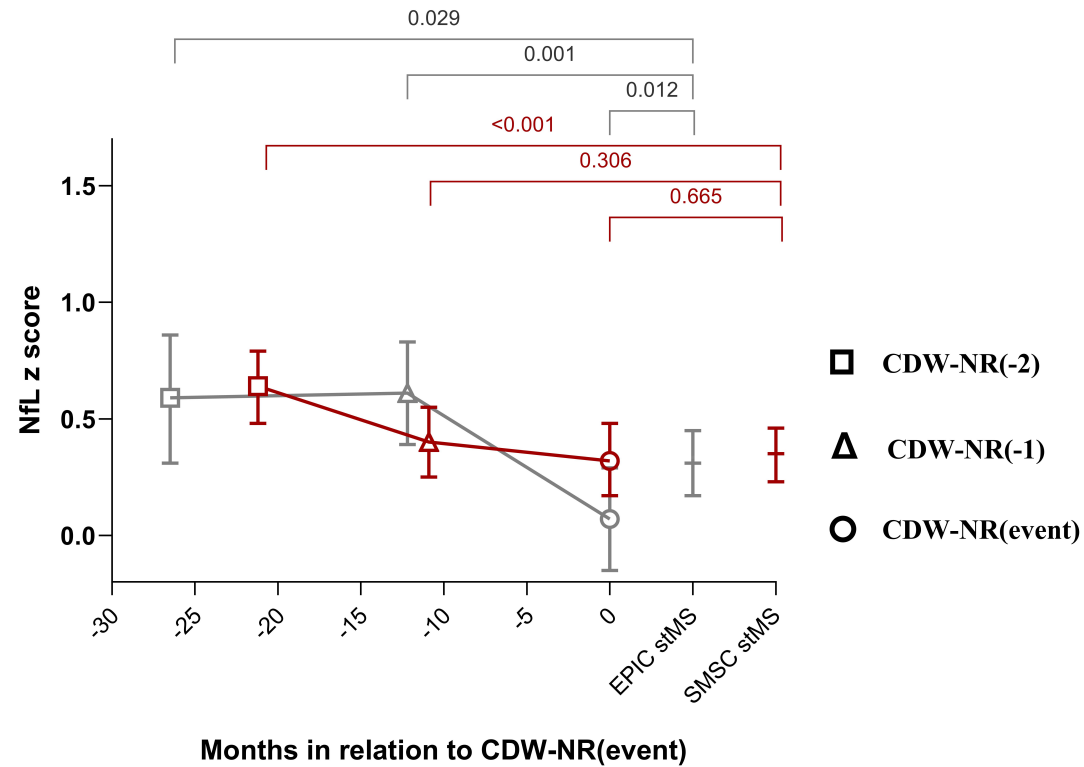

Y axis showing the marginal means of NfL z scores and p values from mixed linear models correcting for age, sex, disease course (relapsing vs. progressive MS), DMT categories (high-efficacy monoclonal antibodies, oral DMT, platform DMT, and untreated), and recent relapse (within 90 days) for CDW-NR. CDW-NR: Confirmed disability worsening independent of clinical relapses. stMS: stable MS participants without evidence of disease activity or progression.

**eFigure 4.** Sensitivity Analysis in Patients With Complete MRI Information at Each Visit: NfL Dynamics in Relation to Confirmed Disability Worsening Independent of Clinical Relapses Adjusted for Clinical and Radiological Disease Activity

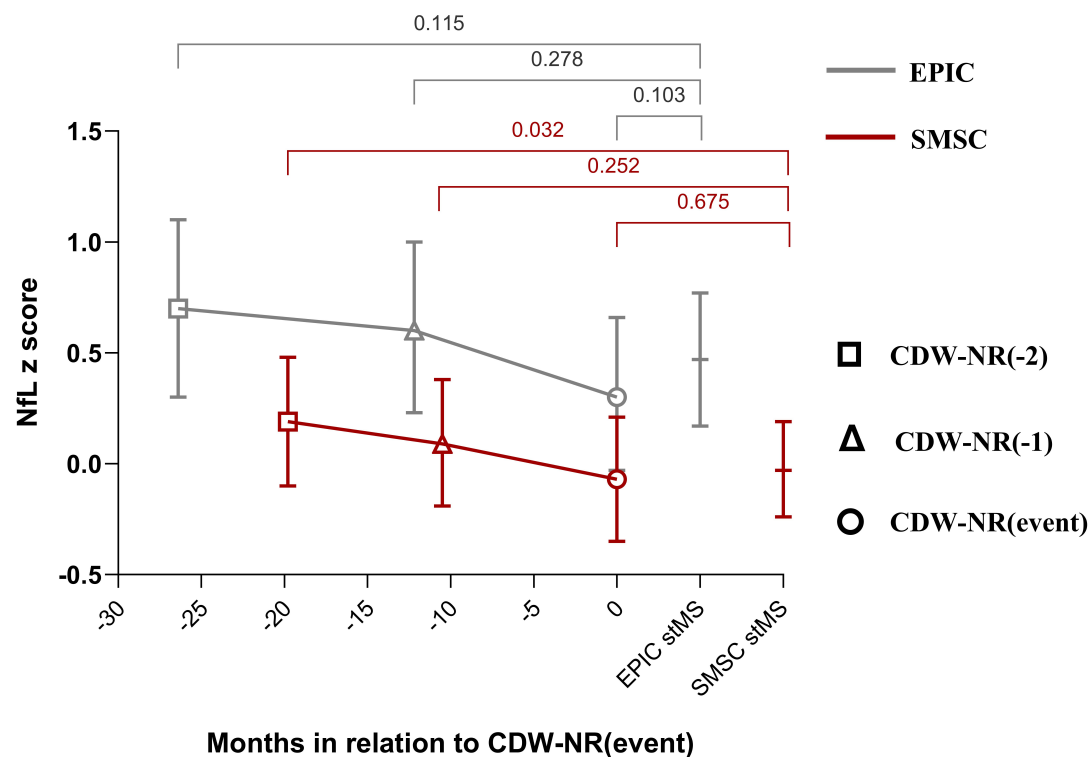

Y axis showing the marginal means of NfL z scores and *p* values from mixed linear models correcting for age, sex, disease course (relapsing vs. progressive MS), DMT categories (high-efficacy monoclonal antibodies, oral DMT, platform DMT, and untreated), and any kind of disease activity (clinical and radiological) over the year preceding the visit of interest. CDW-NR: Confirmed disability worsening independent of clinical relapses, stMS: Stable MS participants without evidence of disease activity or worsening.

**eTable 1.** NfL z Score (Marginal Means) in Relation to Confirmed Disability Worsening With and Independent of Clinical Relapses Compared to Stable Multiple Sclerosis

| Visit         | EPIC     |                                         |                       |          | SMSC     |                                         |                     |          |
|---------------|----------|-----------------------------------------|-----------------------|----------|----------|-----------------------------------------|---------------------|----------|
|               | <i>n</i> | NfL z score (marginal means and 95% CI) | Difference vs stMS    | <i>p</i> | <i>n</i> | NfL z score (marginal means and 95% CI) | Difference vs stMS  | <i>p</i> |
| CDW-R         |          |                                         |                       |          |          |                                         |                     |          |
| CDW-R(-2)     | 10       | 0.52 [-0.13 – 1.16]                     | -0.02 [-0.65 – 0.61]  | 0.956    | 85       | 0.54 [0.33 – 0.75]                      | 0.14 [-0.05 – 0.32] | 0.147    |
| CDW-R(-1)     | 34       | 1.24 [0.87 – 1.62]                      | 0.71 [0.35 – 1.07]    | <0.001   | 97       | 0.72 [0.52 – 0.93]                      | 0.32 [0.14 – 0.49]  | <0.001   |
| CDW-R(event)  | 36       | 0.79 [0.43 – 1.12]                      | 0.26 [-0.09 – 0.61]   | 0.151    | 93       | 0.94 [0.73 – 1.15]                      | 0.53 [0.36 – 0.71]  | <0.001   |
| CDW-R(+1)     | 35       | 0.48 [0.10 – 0.85]                      | -0.06 [-0.41 – 0.29]  | 0.745    | 83       | 0.55 [0.34 – 0.77]                      | 0.15 [-0.04 – 0.33] | 0.122    |
| stMS          | 2562     | 0.53 [0.39 – 0.68]                      | -                     | -        | 6019     | 0.41 [0.29 – 0.52]                      | -                   | -        |
| CDW-NR        |          |                                         |                       |          |          |                                         |                     |          |
| CDW-NR(-2)    | 87       | 0.76 [0.51 – 1.01]                      | 0.23 [0.01 – 0.45]    | 0.040    | 313      | 0.62 [0.48 – 0.76]                      | 0.28 [0.18 – 0.37]  | <0.001   |
| CDW-NR(-1)    | 182      | 0.80 [0.61 – 1.00]                      | 0.27 [0.11 – 0.44]    | <0.001   | 357      | 0.43 [0.29 – 0.57]                      | 0.09 [0.00 – 0.18]  | 0.056    |
| CDW-NR(event) | 191      | 0.29 [0.09 – 0.50]                      | -0.23 [-0.39 – -0.08] | 0.004    | 342      | 0.36 [0.22 – 0.50]                      | 0.01 [-0.08 – 0.11] | 0.777    |
| CDW-NR(+1)    | 185      | 0.67 [0.47 – 0.87]                      | 0.14 [-0.02 – 0.30]   | 0.090    | 299      | 0.36 [0.21 – 0.50]                      | 0.01 [-0.09 – 0.11] | 0.811    |
| stMS          | 2562     | 0.53 [0.39 – 0.66]                      | -                     | -        | 6019     | 0.34 [0.23 – 0.45]                      | -                   | -        |

Estimated marginal means of NfL z score together with 95% CI and *p* values, and estimated differences in NfL z score compared to stMS from mixed linear models correcting for age, sex, disease course (relapsing vs progressive MS), DMT categories (high-efficacy monoclonal antibodies, oral DMT, platform DMT, and untreated), and recent relapse (within 90 days). NfL: Neurofilament light chain, CI: Confidence interval, stMS: Stable MS samples, CDW-R: Confirmed disability progression with clinical relapses, CDW-NR: Confirmed disability progression independent of clinical relapses, CDW-R/CDW-NR(-1): One visit preceding the event, CDW-R/CDW-NR(-2): Two visits preceding the event, CDW-R/CDW-NR(event): Visit at the time of first diagnosing of EDSS worsening, CDW-R/CDW-NR(+1): Visit confirming EDSS worsening.

**eTable 2.** Mixed Effect Models Estimating Longitudinal NfL *z* Scores in Context of Confirmed Disability Worsening With Clinical Relapses

| Fixed effect terms         |                                  | EPIC     |                       |                       |          | SMSC     |                       |                       |          |
|----------------------------|----------------------------------|----------|-----------------------|-----------------------|----------|----------|-----------------------|-----------------------|----------|
|                            |                                  | Estimate | Lower Bound of 95% CI | Upper Bound of 95% CI | <i>p</i> | Estimate | Lower Bound of 95% CI | Upper Bound of 95% CI | <i>p</i> |
| CDW-R status vs stMS       | CDW-R(-2)                        | -0.02    | -0.65                 | 0.61                  | 0.956    | 0.14     | -0.05                 | 0.32                  | 0.147    |
|                            | CDW-R(-1)                        | 0.71     | 0.35                  | 1.07                  | <0.001   | 0.32     | 0.14                  | 0.49                  | <0.001   |
|                            | CDW-R(event)                     | 0.26     | -0.09                 | 0.61                  | 0.151    | 0.53     | 0.36                  | 0.71                  | <0.001   |
|                            | CDW-R(+1)                        | -0.06    | -0.41                 | 0.29                  | 0.745    | 0.15     | -0.04                 | 0.33                  | 0.122    |
|                            | Relapse samples (within a year)  | 0.53     | 0.41                  | 0.64                  | <0.001   | 0.38     | 0.32                  | 0.45                  | <0.001   |
| Sex                        | Female vs male                   | 0.01     | -0.16                 | 0.18                  | 0.935    | 0.06     | -0.05                 | 0.17                  | 0.282    |
| Age (per 10 years change)  |                                  | -0.13    | -0.20                 | -0.06                 | <0.001   | -0.13    | -0.17                 | -0.09                 | <0.001   |
| Disease course at sampling | PMS vs RMS                       | 0.37     | 0.19                  | 0.56                  | <0.001   | 0.12     | -0.05                 | 0.29                  | 0.168    |
| EDSS at sampling           |                                  | 0.05     | 0.02                  | 0.09                  | 0.007    | 0.13     | 0.10                  | 0.16                  | <0.001   |
| DMT vs untreated           | Monoclonal                       | -0.52    | -0.70                 | -0.34                 | <0.001   | -0.46    | -0.55                 | -0.38                 | <0.001   |
|                            | Orals                            | -0.47    | -0.65                 | -0.29                 | <0.001   | -0.36    | -0.45                 | -0.28                 | <0.001   |
|                            | Platforms                        | -0.11    | -0.22                 | 0.00                  | 0.054    | -0.20    | -0.32                 | -0.09                 | 0.001    |
| Recent activity            | Relapse within 90 days yes vs no | 0.12     | -0.05                 | 0.29                  | 0.155    | 0.53     | 0.43                  | 0.63                  | <0.001   |
| BMI (EPIC only)            |                                  | -0.05    | -0.06                 | -0.03                 | <0.001   | /        | /                     | /                     | /        |

Estimated additive effects on NfL *z* score together with 95% CI and *p* values from individual multivariable mixed effects models for EPIC (left) and SMSC (right). We used an indicator variable ‘CDW-R status’ to assign each visit either a time point related to CDW-R or not and used time points outside CDW-R and not after a relapse (i.e. stable MS samples) as a reference. NfL: Neurofilament light chain, CI: Confidence interval, stMS: Stable MS samples, CDW-R: Confirmed disability worsening with clinical relapses, PMS/RMS: Progressive/ relapsing multiple sclerosis. EDSS: Expanded disability status scale, DMT: Disease modifying treatments, BMI: Body mass index.



**eTable 3.** Mixed Effect Models Estimating Longitudinal NfL *z* Scores in Context of Confirmed Disability Worsening Independent of Clinical Relapses

| Model fixed effect terms   |                                  | EPIC     |                       |                       |          | SMSC     |                       |                       |          |
|----------------------------|----------------------------------|----------|-----------------------|-----------------------|----------|----------|-----------------------|-----------------------|----------|
|                            |                                  | Estimate | Lower Bound of 95% CI | Upper Bound of 95% CI | <i>p</i> | Estimate | Lower Bound of 95% CI | Upper Bound of 95% CI | <i>p</i> |
| CDW-NR status vs stMS      | CDW-NR(-2)                       | 0.23     | 0.01                  | 0.45                  | 0.040    | 0.28     | 0.18                  | 0.37                  | <0.001   |
|                            | CDW-NR(-1)                       | 0.27     | 0.11                  | 0.44                  | 0.001    | 0.09     | 0.00                  | 0.18                  | 0.056    |
|                            | CDW-NR(event)                    | -0.23    | -0.39                 | -0.08                 | 0.004    | 0.01     | -0.08                 | 0.11                  | 0.777    |
|                            | CDW-NR(+1)                       | 0.14     | -0.02                 | 0.30                  | 0.090    | 0.01     | -0.09                 | 0.11                  | 0.811    |
|                            | Relapse samples (within a year)  | 0.52     | 0.41                  | 0.63                  | <0.001   | 0.39     | 0.32                  | 0.46                  | <0.001   |
| Sex                        | Female vs male                   | 0.02     | -0.15                 | 0.18                  | 0.861    | 0.07     | 0.04                  | 0.18                  | 0.192    |
| Age (per 10 years change)  |                                  | -0.13    | -0.20                 | -0.06                 | 0.000    | -0.13    | -0.17                 | -0.09                 | <0.001   |
| Disease course at sampling | PMS vs RMS                       | 0.38     | 0.21                  | 0.56                  | <0.001   | 0.27     | 0.11                  | 0.42                  | 0.001    |
| EDSS at sampling           |                                  | 0.05     | 0.01                  | 0.09                  | 0.009    | 0.11     | 0.08                  | 0.13                  | <0.001   |
| DMT vs untreated           | Monoclonal                       | -0.57    | -0.74                 | -0.40                 | <0.001   | -0.40    | -0.49                 | -0.32                 | <0.001   |
|                            | Orals                            | -0.50    | -0.67                 | -0.32                 | <0.001   | -0.31    | -0.38                 | -0.23                 | <0.001   |
|                            | Platforms                        | -0.10    | -0.20                 | -0.004                | 0.041    | -0.12    | -0.23                 | -0.01                 | 0.026    |
| Recent activity            | Relapse within 90 days yes vs no | 0.13     | -0.03                 | 0.29                  | 0.102    | 0.55     | 0.45                  | 0.65                  | <0.001   |
| BMI (EPIC only)            |                                  | -0.04    | -0.06                 | -0.03                 | <0.001   | /        | /                     | /                     | /        |

Estimated additive effects on NfL *z* score together with 95% CI and *p* values from individual multivariable mixed effects models for EPIC (left) and SMSC (right). We used an indicator variable ‘CDW-NR status’ to assign each visit either a time point related to CDW-NR or not and used time points outside CDW-NR and not after a relapse (i.e. stable MS samples) as a reference. NfL: Neurofilament light chain, CI: Confidence interval, stMS: Stable MS samples, CDW-NR: Confirmed disability worsening independent of clinical relapses, PMS/RMS: Progressive/ relapsing multiple sclerosis. EDSS: Expanded disability status scale, DMT: Disease modifying treatments, BMI: Body mass index.

**eTable 4.** Subgroup Analysis in People With Relapsing-Remitting Multiple Sclerosis: NfL z Score (Marginal Means) in Relation to Confirmed Disability Worsening Independent of Clinical Relapses Compared to Stable Multiple Sclerosis

| Visit         | EPIC     |                                         |                       |          | SMSC     |                                         |                      |          |
|---------------|----------|-----------------------------------------|-----------------------|----------|----------|-----------------------------------------|----------------------|----------|
|               | <i>n</i> | NfL z score (marginal means and 95% CI) | Difference vs stMS    | <i>p</i> | <i>n</i> | NfL z score (marginal means and 95% CI) | Difference vs stMS   | <i>p</i> |
| CDW-NR(-2)    | 73       | 0.59 [0.31 – 0.86]                      | 0.28 [0.03 – 0.53]    | 0.029    | 250      | 0.64 [0.48 – 0.79]                      | 0.29 [0.18 – 0.40]   | <0.001   |
| CDW-NR(-1)    | 152      | 0.61 [0.39 – 0.83]                      | 0.30 [0.12 – 0.49]    | 0.001    | 278      | 0.40 [0.25 – 0.55]                      | 0.05 [-0.05 – 0.15]  | 0.306    |
| CDW-NR(event) | 151      | 0.07 [-0.15 – 0.29]                     | -0.23 [-0.42 – -0.05] | 0.012    | 255      | 0.32 [0.17 – 0.48]                      | -0.02 [-0.13 – 0.08] | 0.665    |
| CDW-NR(+1)    | 143      | 0.50 [0.28 – 0.72]                      | 0.19 [0.01 – 0.38]    | 0.043    | 215      | 0.29 [0.13 – 0.45]                      | -0.06 [-0.17 – 0.06] | 0.330    |
| stMS          | 2108     | 0.31 [0.17 – 0.45]                      | -                     | -        | 5476     | 0.35 [0.23 – 0.46]                      | -                    | -        |

Estimated marginal means of NfL z score together with 95% CI and *p* values, and estimated differences in NfL z score compared to stMS from mixed linear models correcting for age, sex, disease course (relapsing vs progressive MS), DMT categories (high-efficacy monoclonal antibodies, oral DMT, platform DMT, and untreated), and recent relapse (within 90 days). NfL: Neurofilament light chain, CI: confidence interval, stMS: Stable MS samples. CDW-NR: Confirmed disability progression independent of clinical relapses. CDW-NR(-1): One visit preceding the event, CDW-NR(-2): Two visits preceding the event, CDW-NR(event): Visit at the time of first diagnosing of EDSS worsening, CDW-NR(+1): Visit confirming EDSS worsening.

**eTable 5.** Subgroup Analysis in People With Relapsing-Remitting Multiple Sclerosis: Mixed-Effects Models Evaluating Longitudinal NfL z Scores in Cases With Confirmed Disability Worsening Independent of Clinical Relapses in Participants With Relapsing-Remitting Multiple Sclerosis

| Model fixed effect terms  |                                      | EPIC     |                       |                       |          | SMSC     |                       |                       |          |
|---------------------------|--------------------------------------|----------|-----------------------|-----------------------|----------|----------|-----------------------|-----------------------|----------|
|                           |                                      | Estimate | Lower Bound of 95% CI | Upper Bound of 95% CI | <i>p</i> | Estimate | Lower Bound of 95% CI | Upper Bound of 95% CI | <i>p</i> |
| CDW-NR status vs stMS     | CDW-NR(-2)                           | 0.28     | 0.03                  | 0.53                  | 0.029    | 0.29     | 0.18                  | 0.40                  | <0.001   |
|                           | CDW-NR(-1)                           | 0.30     | 0.12                  | 0.49                  | 0.001    | 0.05     | -0.05                 | 0.15                  | 0.306    |
|                           | CDW-NR(event)                        | -0.23    | -0.42                 | -0.05                 | 0.012    | -0.02    | -0.13                 | 0.08                  | 0.665    |
|                           | CDW-NR(+1)                           | 0.19     | 0.01                  | 0.38                  | 0.043    | -0.06    | -0.17                 | 0.06                  | 0.330    |
|                           | Relapse samples (within a year)      | 0.56     | 0.44                  | 0.67                  | <0.001   | 0.39     | 0.32                  | 0.46                  | <0.001   |
| Sex                       | Female vs male                       | 0.02     | -0.16                 | 0.21                  | 0.807    | 0.07     | -0.04                 | 0.19                  | 0.207    |
| Age (per 10 years change) |                                      | -0.12    | -0.21                 | -0.06                 | <0.001   | -0.13    | -0.17                 | -0.08                 | <0.001   |
| EDSS at sampling          |                                      | 0.03     | -0.02                 | 0.07                  | 0.251    | 0.11     | 0.08                  | 0.14                  | <0.001   |
| DMT vs untreated          | Monoclonal                           | -0.65    | -0.86                 | -0.44                 | <0.001   | -0.44    | -0.53                 | -0.35                 | <0.001   |
|                           | Orals                                | -0.43    | -0.63                 | -0.22                 | <0.001   | -0.33    | -0.41                 | -0.25                 | <0.001   |
|                           | Platforms                            | -0.12    | -0.23                 | -0.004                | 0.043    | -0.14    | -0.25                 | -0.03                 | 0.014    |
| Activity                  | Any activity within a year yes vs no | 0.17     | -0.01                 | 0.34                  | 0.058    | 0.57     | 0.47                  | 0.67                  | <0.001   |
| BMI (EPIC only)           |                                      | -0.04    | -0.06                 | -0.03                 | <0.001   | /        | /                     | /                     | /        |

Estimated additive effects on NfL z score together with 95% CI and *p* values from individual multivariable mixed effects models for EPIC (left) and SMSC (right). We used an indicator variable ‘CDW-NR status’ to assign each visit either a time point related to CDW-NR or not and used time points outside CDW-NR and not after a relapse (i.e. stable MS samples) as a reference. NfL: Neurofilament light chain, CI: confidence interval, stMS: Stable MS samples, CDW-NR: Confirmed disability worsening independent of clinical relapses, EDSS: Expanded disability status scale, DMT: Disease modifying treatments, BMI: Body mass index.

**eTable 6.** Sensitivity Analyses in SMSC Restricted to Yearly Visits: NfL *z* Score (Marginal Means) in Relation to Confirmed Disability Worsening

| Model fixed effect terms | CDW-R    |          |                       |                       |          | CDW-NR   |          |                       |                       |          |
|--------------------------|----------|----------|-----------------------|-----------------------|----------|----------|----------|-----------------------|-----------------------|----------|
|                          | <i>n</i> | Estimate | Lower Bound of 95% CI | Upper Bound of 95% CI | <i>p</i> | <i>n</i> | Estimate | Lower Bound of 95% CI | Upper Bound of 95% CI | <i>p</i> |
| CDW(-2)                  | 52       | 0.44     | 0.20                  | 0.69                  | <0.001   | 187      | 0.20     | 0.07                  | 0.33                  | 0.002    |
| CDW(-1)                  | 72       | 0.35     | 0.14                  | 0.57                  | 0.001    | 228      | 0.13     | 0.01                  | 0.24                  | 0.038    |
| CDW(event)               | 71       | 0.38     | 0.17                  | 0.60                  | 0.001    | 225      | 00       | -0.12                 | 0.12                  | 0.979    |
| CDW(+1)                  | 60       | 0.04     | -0.19                 | 0.27                  | 0.709    | 191      | -0.04    | -0.17                 | 0.09                  | 0.545    |
| stMS                     | 4244     | 0.43     | 0.30                  | 0.56                  | -        | 4244     | 0.38     | 0.25                  | 0.50                  | -        |

Estimated marginal means of NfL *z* score together with 95% CI and *p* values, and estimated differences in NfL *z* score compared to stMS from mixed linear models correcting for age, sex, disease course (relapsing vs progressive MS), DMT categories (high-efficacy monoclonal antibodies, oral DMT, platform DMT, and untreated), and recent relapse (within 90 days). NfL: Neurofilament light chain, CI: confidence interval, stMS: Stable MS samples, CDW-R: Confirmed disability progression with clinical relapses, CDW-NR: Confirmed disability progression independent of clinical relapses. CDW-R/CDW-NR(-1): One visit preceding the event, CDW-R/CDW-NR(-2): Two visits preceding the event, CDW-R/CDW-NR(event): Visit at the time of first diagnosing of EDSS worsening, CDW-R/CDW-NR(+1): Visit confirming EDSS worsening.

**eTable 7.** Sensitivity Analysis in Participants With MRI Information Available at Each Visit: Mixed-Effects Models Estimating Longitudinal NfL z Scores in Context of Confirmed Disability Worsening Independent of Clinical Relapses, Accounting for Clinical and Magnetic Resonance Imaging Activity

| Model fixed effect terms   |                                      | EPIC     |                       |                       |          | SMSC     |                       |                       |          |
|----------------------------|--------------------------------------|----------|-----------------------|-----------------------|----------|----------|-----------------------|-----------------------|----------|
|                            |                                      | Estimate | Lower Bound of 95% CI | Upper Bound of 95% CI | <i>p</i> | Estimate | Lower Bound of 95% CI | Upper Bound of 95% CI | <i>p</i> |
| CDW-NR status vs stMS      | CDW-NR(-2)                           | 0.23     | -0.06                 | 0.52                  | 0.115    | 0.22     | 0.02                  | 0.42                  | 0.032    |
|                            | CDW-NR(-1)                           | 0.13     | -0.11                 | 0.38                  | 0.278    | 0.12     | -0.08                 | 0.32                  | 0.252    |
|                            | CDW-NR(event)                        | -0.15    | -0.34                 | 0.03                  | 0.103    | -0.04    | -0.24                 | 0.15                  | 0.675    |
|                            | CDW-NR(+1)                           | 0.25     | 0.05                  | 0.45                  | 0.013    | -0.14    | -0.36                 | 0.09                  | 0.236    |
|                            | Relapse samples (within a year)      | 0.33     | 0.15                  | 0.50                  | <0.001   | -0.01    | -0.19                 | 0.17                  | 0.898    |
| Sex                        | Female vs male                       | 0.004    | -0.18                 | 0.19                  | 0.967    | 0.10     | -0.06                 | 0.27                  | 0.222    |
| Age (per 10 years change)  |                                      | -0.03    | -0.12                 | 0.06                  | 0.498    | -0.10    | -0.17                 | -0.03                 | 0.006    |
| Disease course at sampling | PMS vs RMS                           | 0.45     | 0.20                  | 0.70                  | <0.001   | 0.07     | -0.23                 | 0.37                  | 0.634    |
| EDSS at sampling           |                                      | 0.08     | 0.02                  | 0.13                  | 0.005    | 0.14     | 0.08                  | 0.19                  | <0.001   |
| DMT vs untreated           | Monoclonal                           | -0.38    | -0.62                 | -0.13                 | 0.003    | -0.05    | -0.27                 | 0.17                  | 0.646    |
|                            | Orals                                | -0.29    | -1.37                 | 0.79                  | 0.595    | -0.16    | -0.35                 | 0.03                  | 0.103    |
|                            | Platforms                            | -0.05    | -0.19                 | 0.09                  | 0.514    | 0.01     | -0.25                 | 0.26                  | 0.966    |
| Activity                   | Any activity within a year yes vs no | 0.06     | -0.06                 | 0.19                  | 0.315    | 0.40     | 0.28                  | 0.51                  | <0.001   |
| BMI (EPIC only)            |                                      | -0.06    | -0.07                 | -0.04                 | <0.001   | /        | /                     | /                     | /        |

Estimated additive effects on NfL z score together with 95% CI and *p* values from individual multivariable mixed effects models for EPIC (left) and SMSC (right). We used an indicator variable ‘CDW-NR status’ to assign each visit either a time point related to CDW-NR or not and used time points outside CDW-NR and not after a relapse (i.e. stable MS samples) as a reference. NfL: Neurofilament light chain, CI: Confidence interval, stMS: Stable MS samples, CDW-NR: Confirmed disability worsening independent of clinical relapses, EDSS: Expanded disability status scale, DMT: Disease modifying treatments, BMI: Body mass index.

**eTable 8.** Association Between NfL z Score and Future Risk of Confirmed Disability Worsening with Clinical Relapses at Visit CDW-R(-1)

| Variables                      |                                  | EPIC |                       |                       |          | SMSC |                       |                       |          |
|--------------------------------|----------------------------------|------|-----------------------|-----------------------|----------|------|-----------------------|-----------------------|----------|
|                                |                                  | HR   | Lower Bound of 95% CI | Upper Bound of 95% CI | <i>p</i> | HR   | Lower Bound of 95% CI | Upper Bound of 95% CI | <i>p</i> |
| NfL z score (continuous scale) |                                  | 1.19 | 0.97                  | 1.47                  | 0.096    | 1.20 | 0.99                  | 1.46                  | 0.060    |
| Sex                            | Female vs male                   | 1.28 | 0.61                  | 2.66                  | 0.514    | 0.98 | 0.64                  | 1.49                  | 0.920    |
| Age (per 10 years change)      |                                  | 0.88 | 0.59                  | 1.3                   | 0.510    | 0.83 | 0.69                  | 1.00                  | 0.049    |
| Disease course at sampling     | PMS vs RMS                       | 2.71 | 0.56                  | 13.17                 | 0.218    | 0.60 | 0.24                  | 1.53                  | 0.286    |
| EDSS at baseline               |                                  | 0.66 | 0.44                  | 1                     | 0.050    | 1.07 | 0.90                  | 1.26                  | 0.456    |
| DMT vs untreated*              | Monoclonal                       | 1.03 | 0.51                  | 2.06                  | 0.933    | 0.58 | 0.31                  | 1.06                  | 0.077    |
|                                | Orals                            |      |                       |                       |          | 0.82 | 0.46                  | 1.45                  | 0.490    |
|                                | Platforms                        |      |                       |                       |          | 0.44 | 0.16                  | 1.21                  | 0.112    |
| Recent activity                | Relapse within 90 days yes vs no | 1.49 | 0.48                  | 4.64                  | 0.493    | 2.1  | 0.98                  | 4.37                  | 0.057    |
| BMI (EPIC only)                |                                  | 1.05 | 1.00                  | 1.11                  | 0.071    | /    | /                     | /                     | /        |

Estimated hazard ratios (HR) from a multivariable time-to-CDW-R Cox regression model using NfL z score as a time-varying covariate. NfL: Neurofilament light chain, CDW-R: Confirmed disability worsening with clinical relapses, CDW-R(-1): One visit preceding the event, CI: Confidence interval, PMS/RMS: Progressive/ relapsing multiple sclerosis. EDSS: Expanded disability status scale, DMT: Disease modifying treatments, BMI: Body mass index. \*DMT group were merged in EPIC due to the low number of events in each group separately

**eTable 9.** Association Between NfL z Score > 1.0 and Future Risk of Confirmed Disability Worsening with Clinical Relapses at Visit CDW-R(-1)

| Variables                  |                                  | EPIC |                       |                       |          | SMSC |                       |                       |          |
|----------------------------|----------------------------------|------|-----------------------|-----------------------|----------|------|-----------------------|-----------------------|----------|
|                            |                                  | HR   | Lower Bound of 95% CI | Upper Bound of 95% CI | <i>p</i> | HR   | Lower Bound of 95% CI | Upper Bound of 95% CI | <i>p</i> |
| NfL z score > 1.0          |                                  | 1.91 | 0.94                  | 3.87                  | 0.073    | 1.70 | 1.10                  | 2.61                  | 0.017    |
| Sex                        | Female vs male                   | 1.24 | 0.59                  | 2.61                  | 0.569    | 0.98 | 0.64                  | 1.49                  | 0.925    |
| Age (per 10 years change)  |                                  | 0.88 | 0.59                  | 1.29                  | 0.503    | 0.83 | 0.69                  | 1.001                 | 0.051    |
| Disease course at sampling | PMS vs RMS                       | 2.62 | 0.53                  | 12.9                  | 0.236    | 0.60 | 0.24                  | 1.53                  | 0.284    |
| EDSS at baseline           |                                  | 0.66 | 0.44                  | 1                     | 0.052    | 1.07 | 0.91                  | 1.26                  | 0.442    |
| DMT vs untreated*          | Monoclonal                       | 1.04 | 0.52                  | 2.08                  | 0.905    | 0.58 | 0.32                  | 1.08                  | 0.086    |
|                            | Orals                            |      |                       |                       |          | 0.82 | 0.46                  | 1.45                  | 0.493    |
|                            | Platforms                        |      |                       |                       |          | 0.45 | 0.16                  | 1.22                  | 0.117    |
| Recent activity            | Relapse within 90 days yes vs no | 1.47 | 0.47                  | 4.65                  | 0.509    | 2.11 | 1.01                  | 4.39                  | 0.047    |
| BMI (EPIC only)            |                                  | 1.05 | 1                     | 1.11                  | 0.071    | /    | /                     | /                     | /        |

Estimated hazard ratios (HR) from a multivariable time-to-CDW-R Cox regression model using NfL z score as a time-varying covariate. NfL: Neurofilament light chain, CDW-R: Confirmed disability worsening with clinical relapses, CDW-R(-1): One visit preceding the event, CI: Confidence interval, PMS/RMS: Progressive/ relapsing multiple sclerosis. EDSS: Expanded disability status scale, DMT: Disease modifying treatments, BMI: Body mass index. \*DMT group were merged in EPIC due to the low number of events in each group separately

**eTable 10.** Association Between NfL z Score and Future Risk of Confirmed Disability Worsening with Clinical Relapses at Visit CDW-R(-2)

| Variables                      |                                  | EPIC |                       |                       |          | SMSC |                       |                       |          |
|--------------------------------|----------------------------------|------|-----------------------|-----------------------|----------|------|-----------------------|-----------------------|----------|
|                                |                                  | HR   | Lower Bound of 95% CI | Upper Bound of 95% CI | <i>p</i> | HR   | Lower Bound of 95% CI | Upper Bound of 95% CI | <i>p</i> |
| NfL z score (continuous scale) |                                  | 0.88 | 0.63                  | 1.22                  | 0.441    | 1.01 | 0.82                  | 1.23                  | 0.956    |
| Sex                            | Female vs male                   | 1.54 | 0.46                  | 5.13                  | 0.485    | 1.11 | 0.69                  | 1.77                  | 0.672    |
| Age (per 10 years change)      |                                  | 0.97 | 0.9                   | 1.04                  | 0.362    | 0.80 | 0.66                  | 0.98                  | 0.032    |
| Disease course at sampling     | PMS vs RMS                       | 1.89 | 0.07                  | 51.92                 | 0.706    | 0.36 | 0.11                  | 1.22                  | 0.102    |
| EDSS at baseline               |                                  | 0.78 | 0.38                  | 1.62                  | 0.509    | 1.11 | 0.93                  | 1.34                  | 0.240    |
| DMT vs untreated*              | Monoclonal                       | 1.57 | 0.43                  | 5.70                  | 0.497    | 0.54 | 0.27                  | 1.07                  | 0.079    |
|                                | Orals                            |      |                       |                       |          | 0.87 | 0.48                  | 1.61                  | 0.664    |
|                                | Platforms                        |      |                       |                       |          | 0.19 | 0.04                  | 0.83                  | 0.027    |
| Recent activity                | Relapse within 90 days yes vs no | 1.02 | 0.11                  | 9.29                  | 0.989    | 1.29 | 0.52                  | 3.24                  | 0.583    |
| BMI (EPIC only)                |                                  | 1.06 | 0.97                  | 1.16                  | 0.166    | /    | /                     | /                     | /        |

Estimated hazard ratios (HR) from a multivariable time-to-CDW-R Cox regression model using NfL z score as a time-varying covariate. NfL: Neurofilament light chain, CDW-R: Confirmed disability worsening with clinical relapses, CDW-R(-2): two visits preceding the event, CI: Confidence interval, PMS/RMS: Progressive/ relapsing multiple sclerosis. EDSS: Expanded disability status scale, DMT: Disease modifying treatments, BMI: Body mass index. \*DMT group were merged in EPIC due to the low number of events in each group separately



**eTable 11.** Association Between NfL z Score > 1.0 and Future Risk of Confirmed Disability Worsening with Clinical Relapses at Visit CDW-R(-2)

| Variables                  |                                  | EPIC |                       |                       |          | SMSC |                       |                       |          |
|----------------------------|----------------------------------|------|-----------------------|-----------------------|----------|------|-----------------------|-----------------------|----------|
|                            |                                  | HR   | Lower Bound of 95% CI | Upper Bound of 95% CI | <i>p</i> | HR   | Lower Bound of 95% CI | Upper Bound of 95% CI | <i>p</i> |
| NfL z score > 1.0          |                                  | 0.65 | 0.19                  | 2.25                  | 0.494    | 1.09 | 0.67                  | 1.77                  | 0.726    |
| Sex                        | Female vs male                   | 1.55 | 0.47                  | 5.03                  | 0.470    | 1.11 | 0.69                  | 1.77                  | 0.673    |
| Age (per 10 years change)  |                                  | 0.97 | 0.89                  | 1.04                  | 0.363    | 0.81 | 0.66                  | 0.99                  | 0.039    |
| Disease course at sampling | PMS vs RMS                       | 1.88 | 0.07                  | 51.97                 | 0.709    | 0.36 | 0.11                  | 1.20                  | 0.097    |
| EDSS at baseline           |                                  | 0.78 | 0.38                  | 1.61                  | 0.505    | 1.11 | 0.93                  | 1.33                  | 0.248    |
| DMT vs untreated*          | Monoclonal                       | 1.56 | 0.43                  | 5.72                  | 0.500    | 0.54 | 0.28                  | 1.08                  | 0.082    |
|                            | Orals                            |      |                       |                       |          | 0.88 | 0.48                  | 1.62                  | 0.679    |
|                            | Platforms                        |      |                       |                       |          | 0.19 | 0.04                  | 0.84                  | 0.028    |
| Recent activity            | Relapse within 90 days yes vs no | 1.00 | 0.11                  | 9.07                  | 0.997    | 1.27 | 0.50                  | 3.19                  | 0.614    |
| BMI (EPIC only)            |                                  | 1.07 | 0.98                  | 1.16                  | 0.133    | /    | /                     | /                     | /        |

Estimated hazard ratios (HR) from a multivariable time-to-CDW-R Cox regression model using NfL z score as a time-varying covariate. NfL: Neurofilament light chain, CDW-R: Confirmed disability worsening with clinical relapses, CDW-R(-2): two visits preceding the event, CI: Confidence interval, PMS/RMS: Progressive/ relapsing multiple sclerosis. EDSS: Expanded disability status scale, DMT: Disease modifying treatments, BMI: Body mass index. \*DMT group were merged in EPIC due to the low number of events in each group separately.

**eTable 12.** Association Between NfL z Score and Future Risk of Confirmed Disability Worsening Independent of Clinical Relapses at Visit CDW-NR(-1)

| Variables                      |                                  | EPIC |                       |                       |        | SMSC |                       |                       |        |
|--------------------------------|----------------------------------|------|-----------------------|-----------------------|--------|------|-----------------------|-----------------------|--------|
|                                |                                  | HR   | Lower Bound of 95% CI | Upper Bound of 95% CI | p      | HR   | Lower Bound of 95% CI | Upper Bound of 95% CI | p      |
| NfL z score (continuous scale) |                                  | 1.19 | 1.07                  | 1.33                  | 0.001  | 1.02 | 0.94                  | 1.10                  | 0.717  |
| Sex                            | Female vs male                   | 1.29 | 0.94                  | 1.76                  | 0.115  | 0.88 | 0.73                  | 1.06                  | 0.169  |
| Age (per 10 years change)      |                                  | 1.36 | 1.14                  | 1.61                  | 0.001  | 1.17 | 1.07                  | 1.27                  | 0.001  |
| Disease course at sampling     | PMS vs RMS                       | 3.21 | 1.98                  | 5.22                  | <0.001 | 2.33 | 1.67                  | 3.24                  | <0.001 |
| EDSS at baseline               |                                  | 0.59 | 0.51                  | 0.69                  | <0.001 | 1.04 | 0.97                  | 1.12                  | 0.283  |
| DMT vs untreated*              | Monoclonal                       | 1.04 | 0.77                  | 1.41                  | 0.782  | 1.10 | 0.85                  | 1.42                  | 0.480  |
|                                | Orals                            |      |                       |                       |        | 1.19 | 0.90                  | 1.57                  | 0.230  |
|                                | Platforms                        |      |                       |                       |        | 0.81 | 0.53                  | 1.24                  | 0.322  |
| Recent activity                | Relapse within 90 days yes vs no | 0.78 | 0.4                   | 1.51                  | 0.453  | 1.04 | 0.62                  | 1.73                  | 0.894  |
| BMI (EPIC only)                |                                  | 1.03 | 1.00                  | 1.06                  | 0.036  | /    | /                     | /                     | /      |

Estimated hazard ratios (HR) from a multivariable time-to-CDW-NR Cox regression model using NfL z score as a time-varying covariate. NfL: Neurofilament light chain, CDW-NR: Confirmed disability worsening independent of clinical relapses, CDW-NR(-1): One visit preceding the event, CI: Confidence interval, PMS/RMS: Progressive/ relapsing multiple sclerosis. EDSS: Expanded disability status scale, DMT: Disease modifying treatments, BMI: Body mass index. \*DMT group were merged in EPIC due to the low number of events in each group separately.

**eTable 13.** Association Between NfL z Score > 1.0 and Future Risk of Confirmed Disability Worsening Independent of Clinical Relapses at Visit CDW-NR(-1)

| Variables                  |                                  | EPIC |                       |                       |          | SMSC |                       |                       |          |
|----------------------------|----------------------------------|------|-----------------------|-----------------------|----------|------|-----------------------|-----------------------|----------|
|                            |                                  | HR   | Lower Bound of 95% CI | Upper Bound of 95% CI | <i>p</i> | HR   | Lower Bound of 95% CI | Upper Bound of 95% CI | <i>p</i> |
| NfL z score > 1.0          |                                  | 1.40 | 1.06                  | 1.85                  | 0.017    | 0.94 | 0.76                  | 1.17                  | 0.600    |
| Sex                        | Female vs male                   | 1.27 | 0.93                  | 1.75                  | 0.132    | 0.88 | 0.73                  | 1.06                  | 0.176    |
| Age (per 10 years change)  |                                  | 1.34 | 1.13                  | 1.59                  | 0.001    | 1.16 | 1.06                  | 1.27                  | 0.001    |
| Disease course at sampling | PMS vs RMS                       | 3.28 | 2.02                  | 5.34                  | <0.001   | 2.35 | 1.69                  | 3.28                  | <0.001   |
| EDSS at baseline           |                                  | 0.6  | 0.51                  | 0.69                  | <0.001   | 1.04 | 0.97                  | 1.12                  | 0.244    |
| DMT vs untreated*          | Monoclonal                       | 1.06 | 0.78                  | 1.43                  | 0.717    | 1.09 | 0.84                  | 1.42                  | 0.500    |
|                            | Orals                            |      |                       |                       |          | 1.18 | 0.89                  | 1.57                  | 0.242    |
|                            | Platforms                        |      |                       |                       |          | 0.81 | 0.53                  | 1.23                  | 0.317    |
| Recent activity            | Relapse within 90 days yes vs no | 0.8  | 0.41                  | 1.56                  | 0.519    | 1.06 | 0.63                  | 1.77                  | 0.826    |
| BMI (EPIC only)            |                                  | 1.03 | 1.00                  | 1.06                  | 0.062    | /    | /                     | /                     | /        |

Estimated hazard ratios (HR) from a multivariable time-to-CDW-NR Cox regression model using NfL z score as a time-varying covariate. NfL: Neurofilament light chain, CDW-NR: Confirmed disability worsening independent of clinical relapses, CDW-NR(-1): One visit preceding the event, CI: Confidence interval, PMS/RMS: Progressive/ relapsing multiple sclerosis. EDSS: Expanded disability status scale, DMT: Disease modifying treatments, BMI: Body mass index.

\*DMT group were merged in EPIC due to the low number of events in each group separately

**eTable 14.** Association Between NfL z Score and Future Risk of Confirmed Disability Worsening Independent of Clinical Relapses at Visit CDW-NR(-2)

| Variables                  |                                  | EPIC |                       |                       |          | SMSC |                       |                       |          |
|----------------------------|----------------------------------|------|-----------------------|-----------------------|----------|------|-----------------------|-----------------------|----------|
|                            |                                  | HR   | Lower Bound of 95% CI | Upper Bound of 95% CI | <i>p</i> | HR   | Lower Bound of 95% CI | Upper Bound of 95% CI | <i>p</i> |
| NfL z score continuous     |                                  | 1.16 | 1.01                  | 1.33                  | 0.030    | 1.14 | 1.04                  | 1.24                  | 0.004    |
| Sex                        | Female vs male                   | 1.38 | 0.9                   | 2.11                  | 0.138    | 0.88 | 0.73                  | 1.07                  | 0.190    |
| Age (per 10 years change)  |                                  | 1.03 | 1.01                  | 1.06                  | 0.007    | 1.16 | 1.07                  | 1.27                  | <0.001   |
| Disease course at sampling | PMS vs RMS                       | 2.07 | 1.03                  | 4.15                  | 0.040    | 1.81 | 1.32                  | 2.48                  | <0.001   |
| EDSS at baseline           |                                  | 0.71 | 0.58                  | 0.88                  | 0.001    | 1.06 | 0.99                  | 1.14                  | 0.100    |
| DMT vs untreated*          | Monoclonal                       | 1.32 | 0.89                  | 1.98                  | 0.171    | 1.11 | 0.84                  | 1.48                  | 0.462    |
|                            | Orals                            |      |                       |                       |          | 1.23 | 0.91                  | 1.66                  | 0.180    |
|                            | Platforms                        |      |                       |                       |          | 1.00 | 0.65                  | 1.55                  | 0.996    |
| Recent activity            | Relapse within 90 days yes vs no | 0.75 | 0.32                  | 1.77                  | 0.513    | 0.54 | 0.30                  | 1.00                  | 0.051    |
| BMI (EPIC only)            |                                  | 1.01 | 0.97                  | 1.05                  | 0.714    | /    | /                     | /                     | /        |

Estimated hazard ratios (HR) from a multivariable time-to-CDW-NR Cox regression model using NfL z score as a time-varying covariate. NfL: Neurofilament light chain, CDW-NR: Confirmed disability worsening independent of clinical relapses, CDW-NR(-2): Two visits preceding the event, CI: Confidence interval, PMS/RMS: Progressive/ relapsing multiple sclerosis. EDSS: Expanded disability status scale, DMT: Disease modifying treatments, BMI: Body mass index. \*DMT group were merged in EPIC due to the low number of events in each group separately

**eTable 15.** Association Between NfL z Score > 1.0 and Future Risk of Confirmed Disability Worsening Independent of Clinical Relapses at Visit CDW-NR(-2)

| Variables                  |                                  | EPIC |                       |                       |          | SMSC |                       |                       |          |
|----------------------------|----------------------------------|------|-----------------------|-----------------------|----------|------|-----------------------|-----------------------|----------|
|                            |                                  | HR   | Lower Bound of 95% CI | Upper Bound of 95% CI | <i>p</i> | HR   | Lower Bound of 95% CI | Upper Bound of 95% CI | <i>p</i> |
| NfL z score > 1.0          |                                  | 1.25 | 0.84                  | 1.87                  | 0.274    | 1.49 | 1.20                  | 1.84                  | <0.001   |
| Sex                        | Female vs male                   | 1.37 | 0.89                  | 2.11                  | 0.148    | 0.88 | 0.73                  | 1.07                  | 0.208    |
| Age (per 10 years change)  |                                  | 1.03 | 1.01                  | 1.06                  | 0.010    | 1.17 | 1.07                  | 1.27                  | <0.001   |
| Disease course at sampling | PMS vs RMS                       | 2.13 | 1.06                  | 4.3                   | 0.034    | 1.79 | 1.30                  | 2.47                  | <0.001   |
| EDSS at baseline           |                                  | 0.72 | 0.58                  | 0.88                  | 0.002    | 1.06 | 0.99                  | 1.14                  | 0.108    |
| DMT vs untreated*          | Monoclonal                       | 1.34 | 0.9                   | 2.01                  | 0.153    | 1.12 | 0.85                  | 1.49                  | 0.419    |
|                            | Orals                            |      |                       |                       |          | 1.23 | 0.91                  | 1.66                  | 0.179    |
|                            | Platforms                        |      |                       |                       |          | 1.01 | 0.65                  | 1.56                  | 0.969    |
| Recent activity            | Relapse within 90 days yes vs no | 0.79 | 0.34                  | 1.85                  | 0.588    | 0.55 | 0.30                  | 1.00                  | 0.051    |
| BMI (EPIC only)            |                                  | 1.00 | 0.97                  | 1.04                  | 0.836    | /    | /                     | /                     | /        |

Estimated hazard ratios (HR) from a multivariable time-to-CDW-NR Cox regression model using NfL z score as a time-varying covariate. NfL: Neurofilament light chain, CDW-NR: Confirmed disability worsening independent of clinical relapses, CDW-NR(-2): Two visits preceding the event, CI: Confidence interval, PMS/RMS: Progressive/relapsing multiple sclerosis, EDSS: Expanded disability status scale, DMT: Disease modifying treatments, BMI: Body mass index.

\*DMT groups were merged in EPIC due to the low number of events in each group separately
