# Supplementary material
Source: PubMed Central journal article supplement (PMC10628837)
Supplement: jamaneurol-e233997-s002.pdf [file jamaneurol-e233997-s002.pdf]

## Supplemental Online Content: Nonauthor Collaborators

\*First name, last name, and suffix (if applicable) are required and will appear in PubMed.

| <b>*Group Name(s): UCSF, MS EPIC, and the SMSC Study Teams</b> |                   |                              |                         |                                                                 |                                                 |                                                                |                                                                                                   |
|----------------------------------------------------------------|-------------------|------------------------------|-------------------------|-----------------------------------------------------------------|-------------------------------------------------|----------------------------------------------------------------|---------------------------------------------------------------------------------------------------|
| <b>*First Name and Middle Initial(s)</b>                       | <b>*Last Name</b> | <b>*Suffix (eg, Jr, III)</b> | <b>Academic Degrees</b> | <b>Institution</b>                                              | <b>Location (city, state/province, country)</b> | <b>Role or Contribution, eg, chair, principal investigator</b> | <b>Group (if more than 1 Group listed in the byline) and/or Subgroup (eg, Steering Committee)</b> |
| Sergio                                                         | Baranzini         |                              | PhD                     | UCSF Weill Institute for Neurosciences, Department of Neurology | San Francisco, CA, USA                          |                                                                | EPIC                                                                                              |
| Riley                                                          | Bove              |                              | MD                      | UCSF Weill Institute for Neurosciences, Department of Neurology | San Francisco, CA, USA                          |                                                                | EPIC                                                                                              |
| Michael                                                        | Wilson            |                              | MD                      | UCSF Weill Institute for Neurosciences, Department of Neurology | San Francisco, CA, USA                          |                                                                | EPIC                                                                                              |
| Jill                                                           | Hollenbach        |                              | PhD                     | UCSF Weill Institute for Neurosciences, Department of Neurology | San Francisco, CA, USA                          |                                                                | EPIC                                                                                              |
| Refujia                                                        | Gomez             |                              | BS                      | UCSF Weill Institute for Neurosciences, Department of Neurology | San Francisco, CA, USA                          |                                                                | EPIC                                                                                              |
| Adam                                                           | Santaniello       |                              | BSc                     | UCSF Weill Institute for Neurosciences, Department of Neurology | San Francisco, CA, USA                          |                                                                | EPIC                                                                                              |
| Meagan                                                         | Harms             |                              | BA                      | UCSF Weill Institute for Neurosciences, Department of Neurology | San Francisco, CA, USA                          |                                                                | EPIC                                                                                              |
| Tiffany                                                        | Cooper            |                              | BASc                    | UCSF Weill Institute for Neurosciences, Department of Neurology | San Francisco, CA, USA                          |                                                                | EPIC                                                                                              |
| Stacy                                                          | Caillier          |                              | BSc                     | UCSF Weill Institute for Neurosciences, Department of Neurology | San Francisco, CA, USA                          |                                                                | EPIC                                                                                              |

## Supplemental Online Content: Nonauthor Collaborators

\*First name, last name, and suffix (if applicable) are required and will appear in PubMed.

| *First Name and Middle Initial(s) | *Last Name      | *Suffix (eg, Jr, III) | Academic Degrees | Institution                                                          | Location (city, state/province, country) | Role or Contribution, eg, chair, principal investigator | Group (if more than 1 Group listed in the byline) and/or Subgroup (eg, Steering Committee) |
|-----------------------------------|-----------------|-----------------------|------------------|----------------------------------------------------------------------|------------------------------------------|---------------------------------------------------------|--------------------------------------------------------------------------------------------|
| Johannes                          | Lorscheider     |                       | MD               | Department of Neurology, University Hospital and University of Basel | Basel, Basel, Switzerland                |                                                         | SMSC                                                                                       |
| Alessandro                        | Cagol           |                       | MD               | Department of Neurology, University Hospital and University of Basel | Basel, Basel, Switzerland                |                                                         | SMSC                                                                                       |
| Muhamed                           | Barakovic       |                       | PhD              | Department of Neurology, University Hospital and University of Basel | Basel, Basel, Switzerland                |                                                         | SMSC                                                                                       |
| Riccardo                          | Galbusera       |                       | MD               | Department of Neurology, University Hospital and University of Basel | Basel, Basel, Switzerland                |                                                         | SMSC                                                                                       |
| Özgür                             | Yaldizli        |                       | MD               | Department of Neurology, University Hospital and University of Basel | Basel, Basel, Switzerland                |                                                         | SMSC                                                                                       |
| Suvitha                           | Subramaniam     |                       | MSc              | Department of Neurology, University Hospital and University of Basel | Basel, Basel, Switzerland                |                                                         | SMSC                                                                                       |
| Annette                           | Orleth          |                       | PhD              | Department of Neurology, University Hospital and University of Basel | Basel, Basel, Switzerland                |                                                         | SMSC                                                                                       |
| Tobias                            | Derfuss         |                       | MD               | Department of Neurology, University Hospital and University of Basel | Basel, Basel, Switzerland                |                                                         | SMSC                                                                                       |
| Aleksandra                        | Maleska Maceski |                       | MSc              | Department of Neurology, University Hospital and University of Basel | Basel, Basel, Switzerland                |                                                         | SMSC                                                                                       |

## Supplemental Online Content: Nonauthor Collaborators

\*First name, last name, and suffix (if applicable) are required and will appear in PubMed.

| *First Name and Middle Initial(s) | *Last Name       | *Suffix (eg, Jr, III) | Academic Degrees | Institution                                                                                                                   | Location (city, state/province, country) | Role or Contribution, eg, chair, principal investigator | Group (if more than 1 Group listed in the byline) and/or Subgroup (eg, Steering Committee) |
|-----------------------------------|------------------|-----------------------|------------------|-------------------------------------------------------------------------------------------------------------------------------|------------------------------------------|---------------------------------------------------------|--------------------------------------------------------------------------------------------|
| Eline                             | Willemse         |                       | PhD              | Department of Neurology, University Hospital and University of Basel                                                          | Basel, Basel, Switzerland                |                                                         | SMSC                                                                                       |
| Lars G                            | Hemkens          |                       | MD               | Basel Institute for Clinical Epidemiology and Biostatistics (ceb), Department of Clinical Research, University Hospital Basel | Basel, Basel, Switzerland                |                                                         | SMSC                                                                                       |
| Perrine                           | Janiaud          |                       | PhD              | Department of Clinical Research, University Hospital Basel                                                                    | Basel, Basel, Switzerland                |                                                         | SMSC                                                                                       |
| Lilian                            | Demuth           |                       | MSc              | Department of Neurology, University Hospital and University of Basel                                                          | Basel, Basel, Switzerland                |                                                         | SMSC                                                                                       |
| Bettina                           | Fischer-Barnicol |                       | MD               | Department of Neurology, University Hospital and University of Basel                                                          | Basel, Basel, Switzerland                |                                                         | SMSC                                                                                       |
| Robert                            | Hoepner          |                       | MD               | Department of Neurology, Inselspital, Bern University Hospital                                                                | Bern, Bern, Switzerland                  |                                                         | SMSC                                                                                       |
| Andrew                            | Chan             |                       | MD               | Department of Neurology, Inselspital, Bern University Hospital                                                                | Bern, Bern, Switzerland                  |                                                         | SMSC                                                                                       |
| Oliver                            | Findling         |                       | MD               | Department of Neurology, Cantonal Hospital Aarau                                                                              | Aarau, Aarau, Switzerland                |                                                         | SMSC                                                                                       |
