# Supplementary material
Source: PubMed Central journal article supplement (PMC10628837)
Supplement: jamaneurol-e233997-s003.pdf [file jamaneurol-e233997-s003.pdf]

## Data Sharing Statement

Abdelhak. Neurofilament Light Chain Elevation and Disability Progression in Multiple Sclerosis. *JAMA Neurol.* Published November 06, 2023. doi:10.1001/jamaneurol.2023.3997

### Data

**Data available:** No
